# Supplementary material
Source: HighWire-hosted journal article supplement (https://bmjopen.bmj.com/content/14/12/e086171)
Supplement: inline-supplementary-material-2 [file inline-supplementary-material-2.pdf]

Online Supplemental Material 2

Table S1 - General characteristics of all identified procedures, as well as of the reviewed sample of procedures.

| Category:                                                          |  | Number of occurrences:                                              |     |
|--------------------------------------------------------------------|--|---------------------------------------------------------------------|-----|
| All Maintenance procedures 2012-2022:                              |  | 297                                                                 |     |
| negative opinion:                                                  |  | 8                                                                   |     |
| withdrawn <sup>1</sup>                                             |  | 92                                                                  |     |
| positive opinion:                                                  |  | 197                                                                 |     |
| positive opinion without significant benefit                       |  | 46                                                                  |     |
| positive opinion + significant benefit ( <b>selected sample</b> ): |  | 151                                                                 |     |
| List of questions issued regarding significant benefit?            |  | yes:                                                                | 75  |
|                                                                    |  | no:                                                                 | 76  |
| Grounds for positive opinion:                                      |  | clinically relevant advantage:                                      | 129 |
|                                                                    |  | major contribution to patient care:                                 | 15  |
|                                                                    |  | clinically relevant advantage + major contribution to patient care: | 7   |
| Therapeutic area:                                                  |  | oncology:                                                           | 68  |
|                                                                    |  | non-oncology:                                                       | 83  |

<sup>1</sup>There can be various reasons for withdrawals, such as if the designation holder anticipates a negative opinion from COMP, or if the designation holder received a negative opinion from CHMP, or if there are changes in the designation holder's regulatory strategy.
