# Supplementary material
Source: HighWire-hosted journal article supplement (https://bmjopen.bmj.com/content/14/12/e086171)
Supplement: inline-supplementary-material-6 [file inline-supplementary-material-6.pdf]

Online Supplemental Material 5

|                                                |                                                                                       |
|------------------------------------------------|---------------------------------------------------------------------------------------|
| Category:                                      | N=418                                                                                 |
| Comparisons accepted by the COMP               | 253 (61%)                                                                             |
| Comparisons not considered by the COMP         | 80 (19%)                                                                              |
| Comparisons with unclear appraisal by the COMP | 52 (12%)                                                                              |
| Comparisons not accepted by the COMP           | 33 (8%)                                                                               |
|                                                | Not accepted due to methodological issues13 (3%)                                      |
|                                                | Not accepted due to insufficient effect difference12 (3%)                             |
|                                                | Not accepted due to methodological issues and an insufficient effect difference3 (1%) |
|                                                | Not accepted on unclear grounds5 (1%)                                                 |

Table S2: Appraisal of comparisons by the COMP

Table: absolute and relative frequencies of identified comparison appraisals by the COMP, as recorded in public assessment reports.
