# Supplementary material
Source: HighWire-hosted journal article supplement (https://bmjopen.bmj.com/content/14/12/e086171)

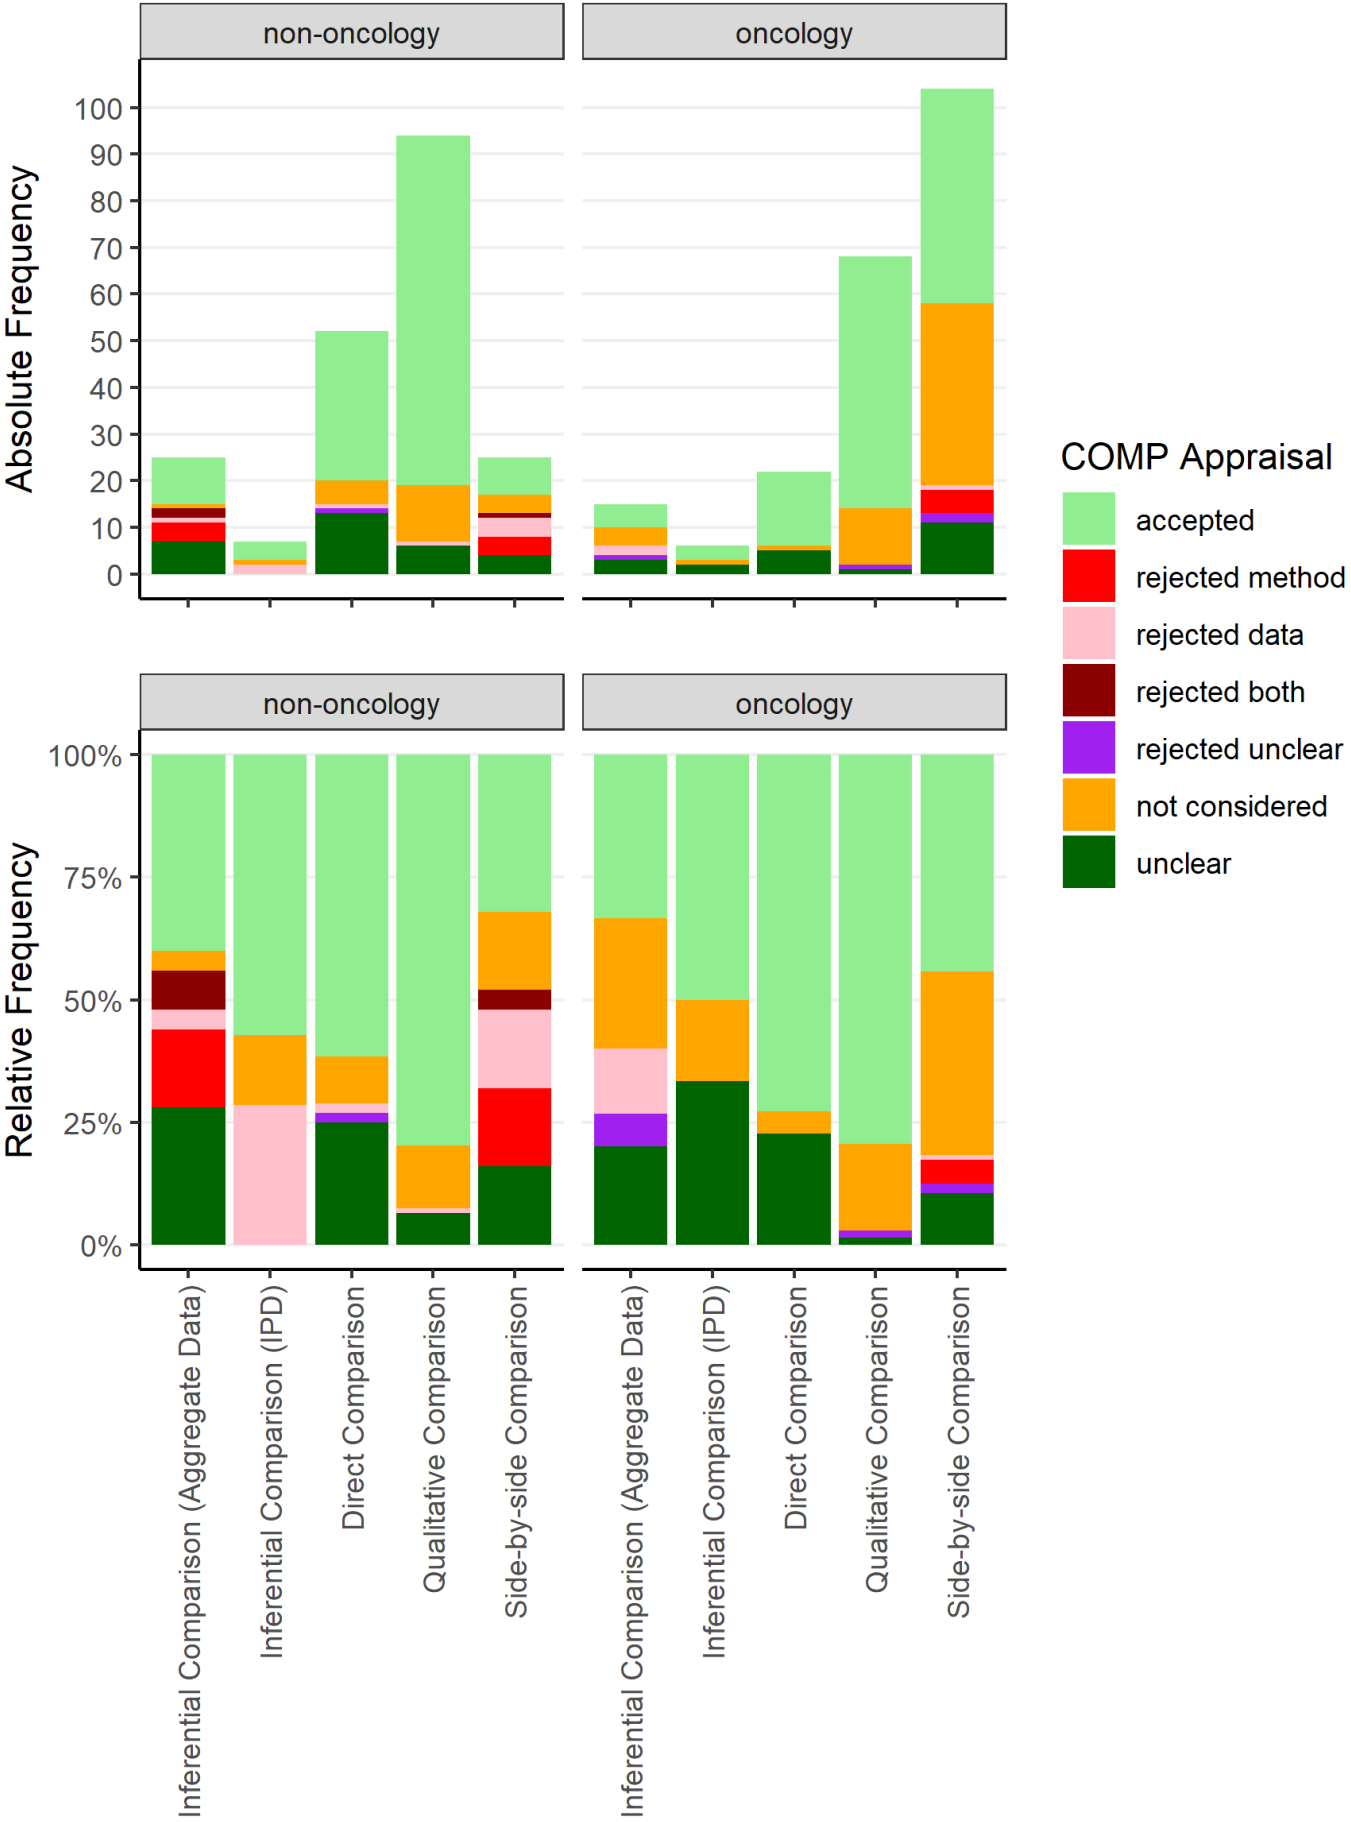

Supplement: inline-supplementary-material-5 [file inline-supplementary-material-5.pdf]
